# Supplementary material for: Phanerozoic radiation of ammonia oxidizing bacteria
Source: PubMed Central journal article supplement (PMC7822890; doi:10.1038/s41598-021-81718-2), 2021-01-22

Tree scale: 1

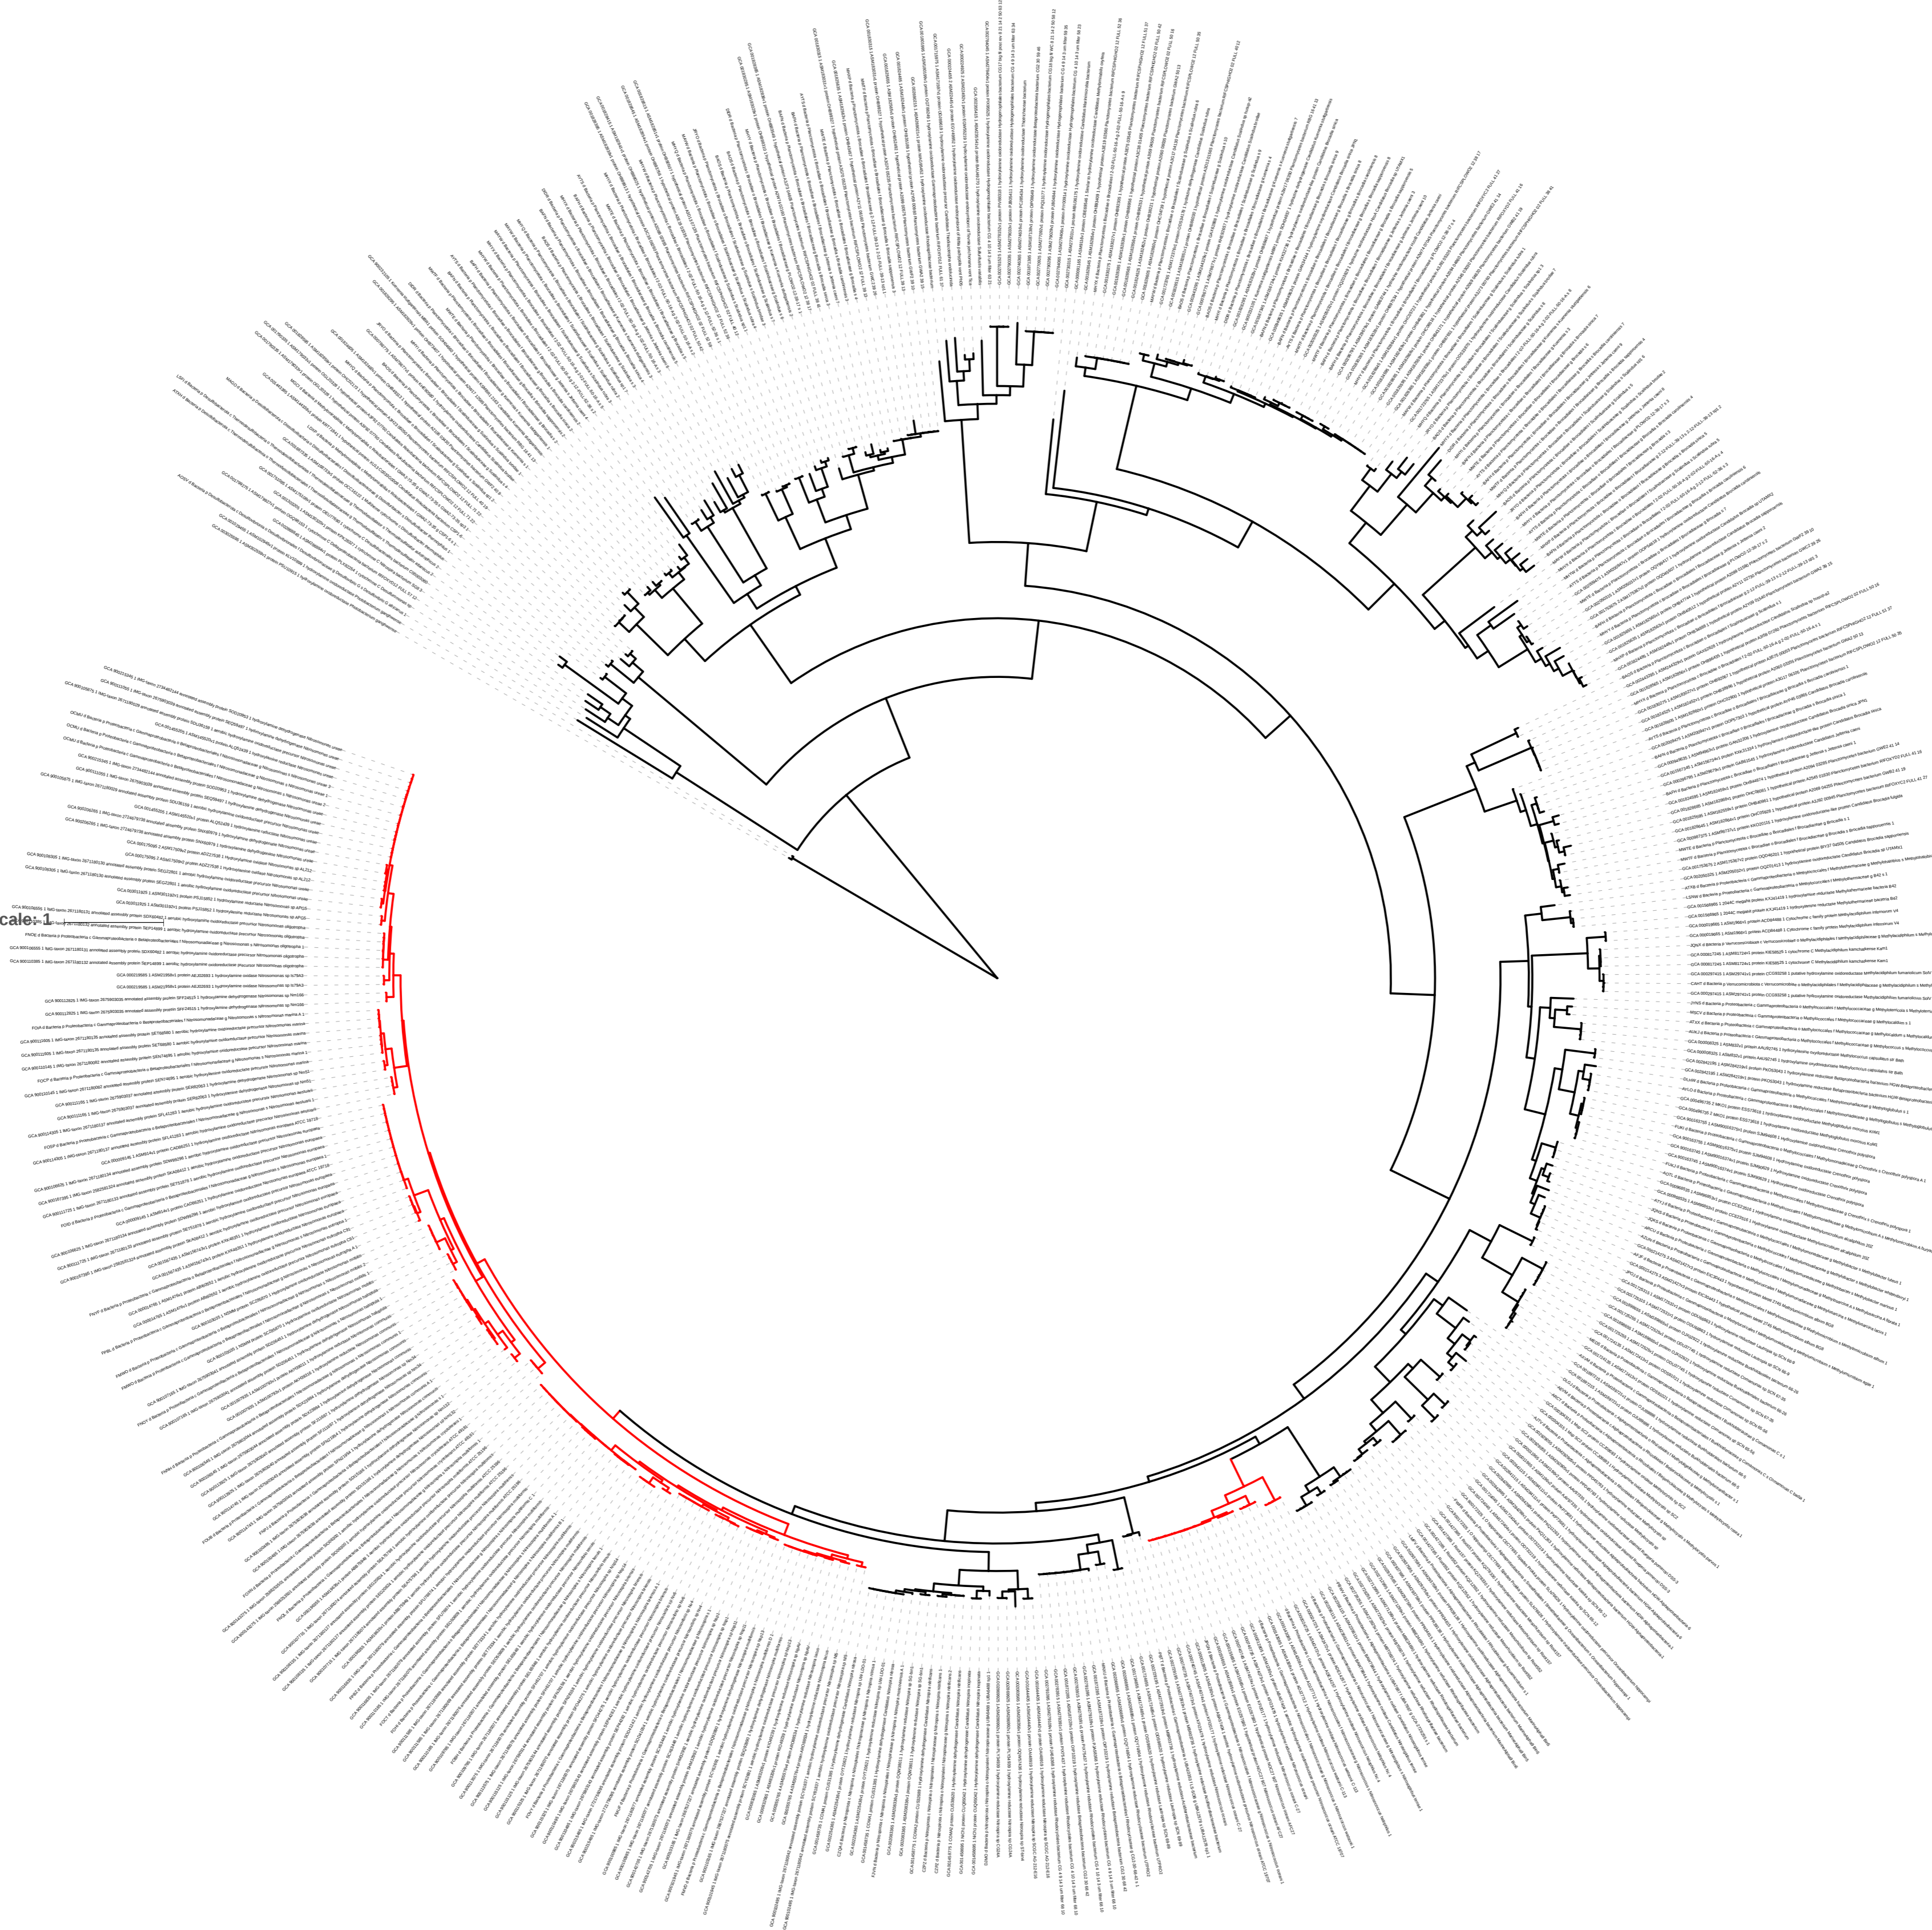

Supplement: 41598_2021_81718_MOESM4_ESM.pdf [file 41598_2021_81718_MOESM4_ESM.pdf]
